# Supplementary material for: Tolerance of citrus plants to the combination of high temperatures and drought is associated to the increase in transpiration modulated by a reduction in abscisic acid levels
Source: PubMed Central journal article supplement (PMC4848825; doi:10.1186/s12870-016-0791-7), 2016-04-27
Supplement: 12870_2016_791_MOESM1_ESM.pdf [file 12870_2016_791_MOESM1_ESM.pdf]

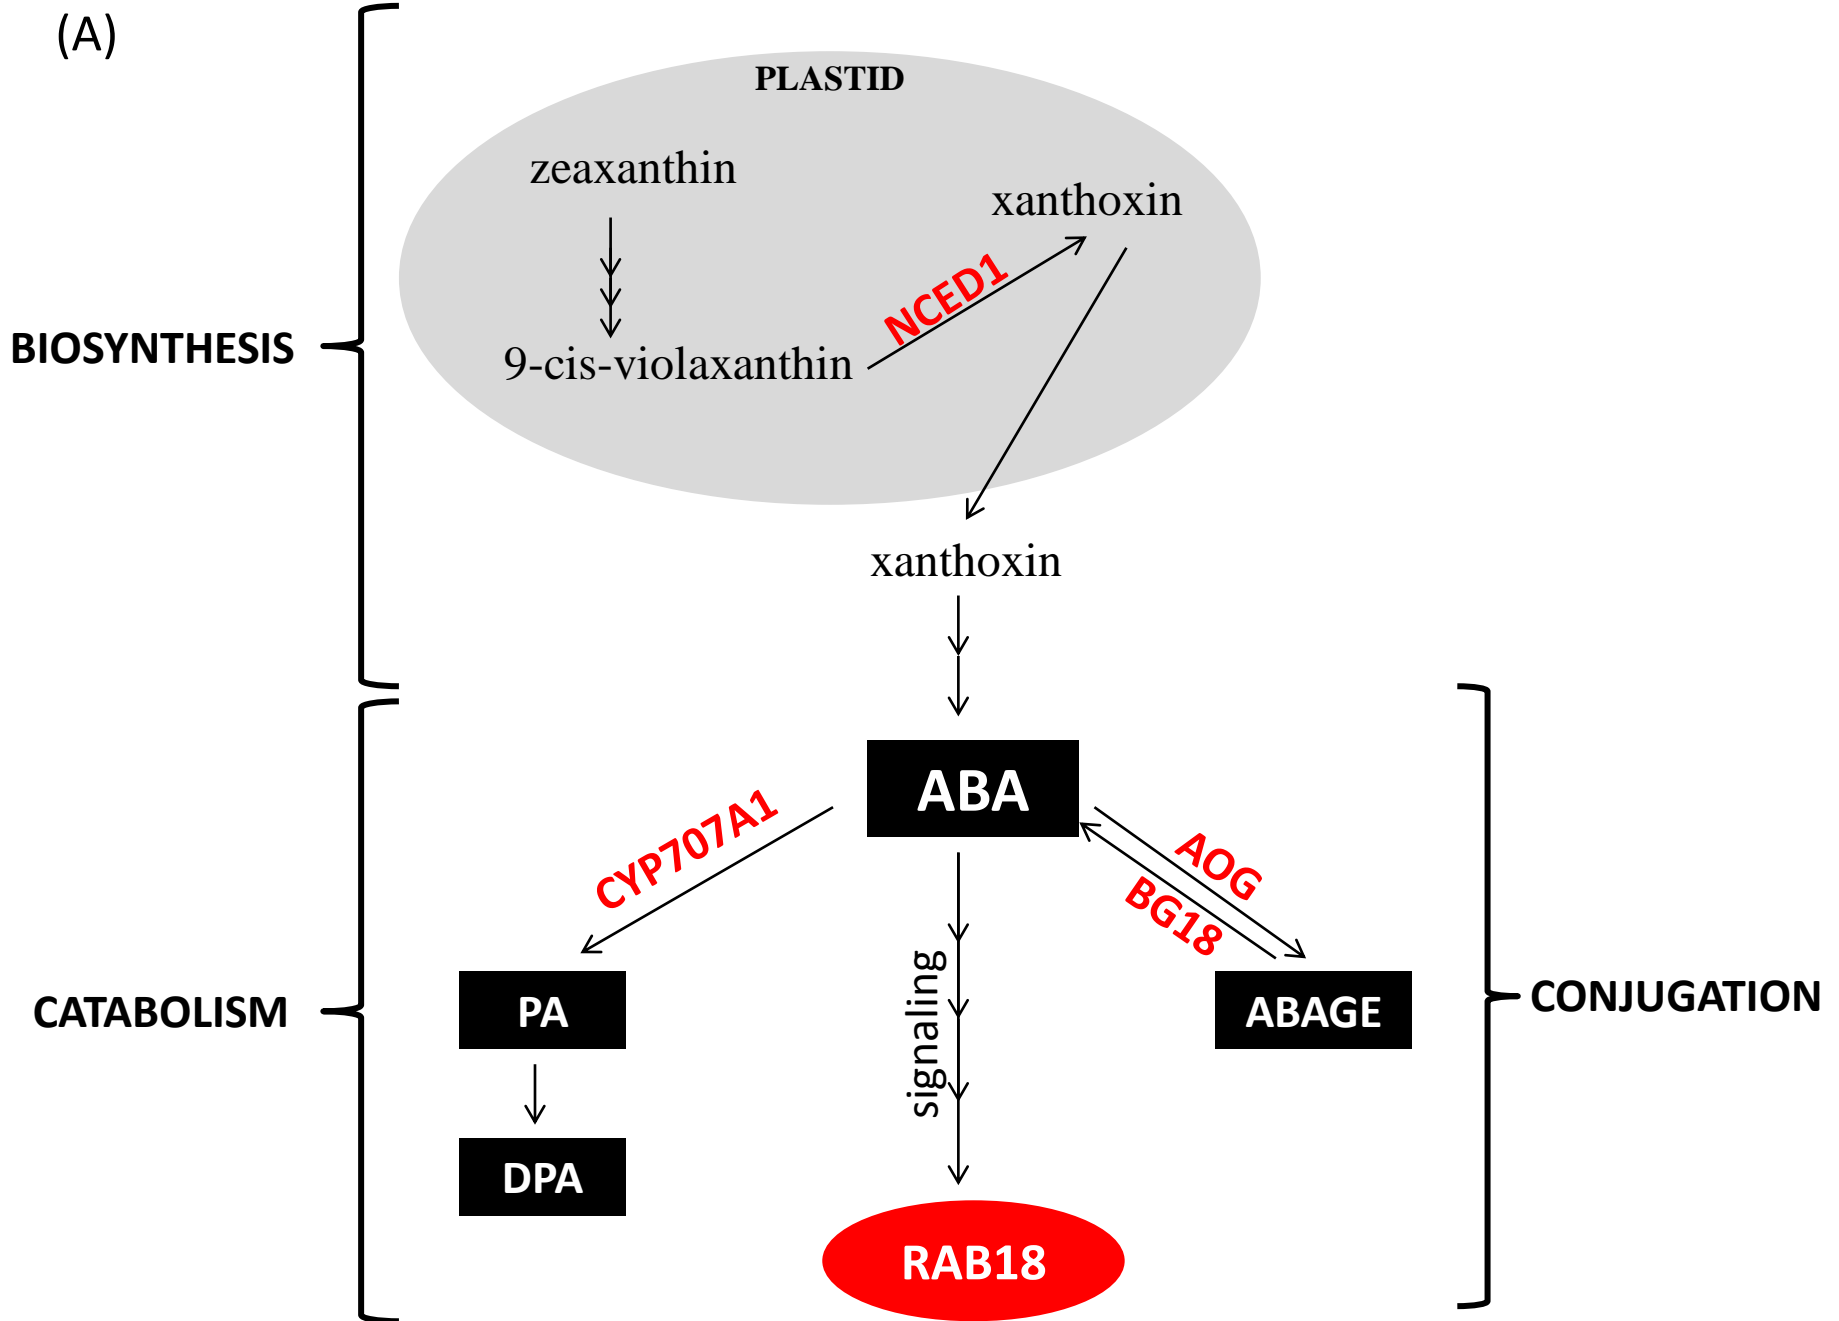

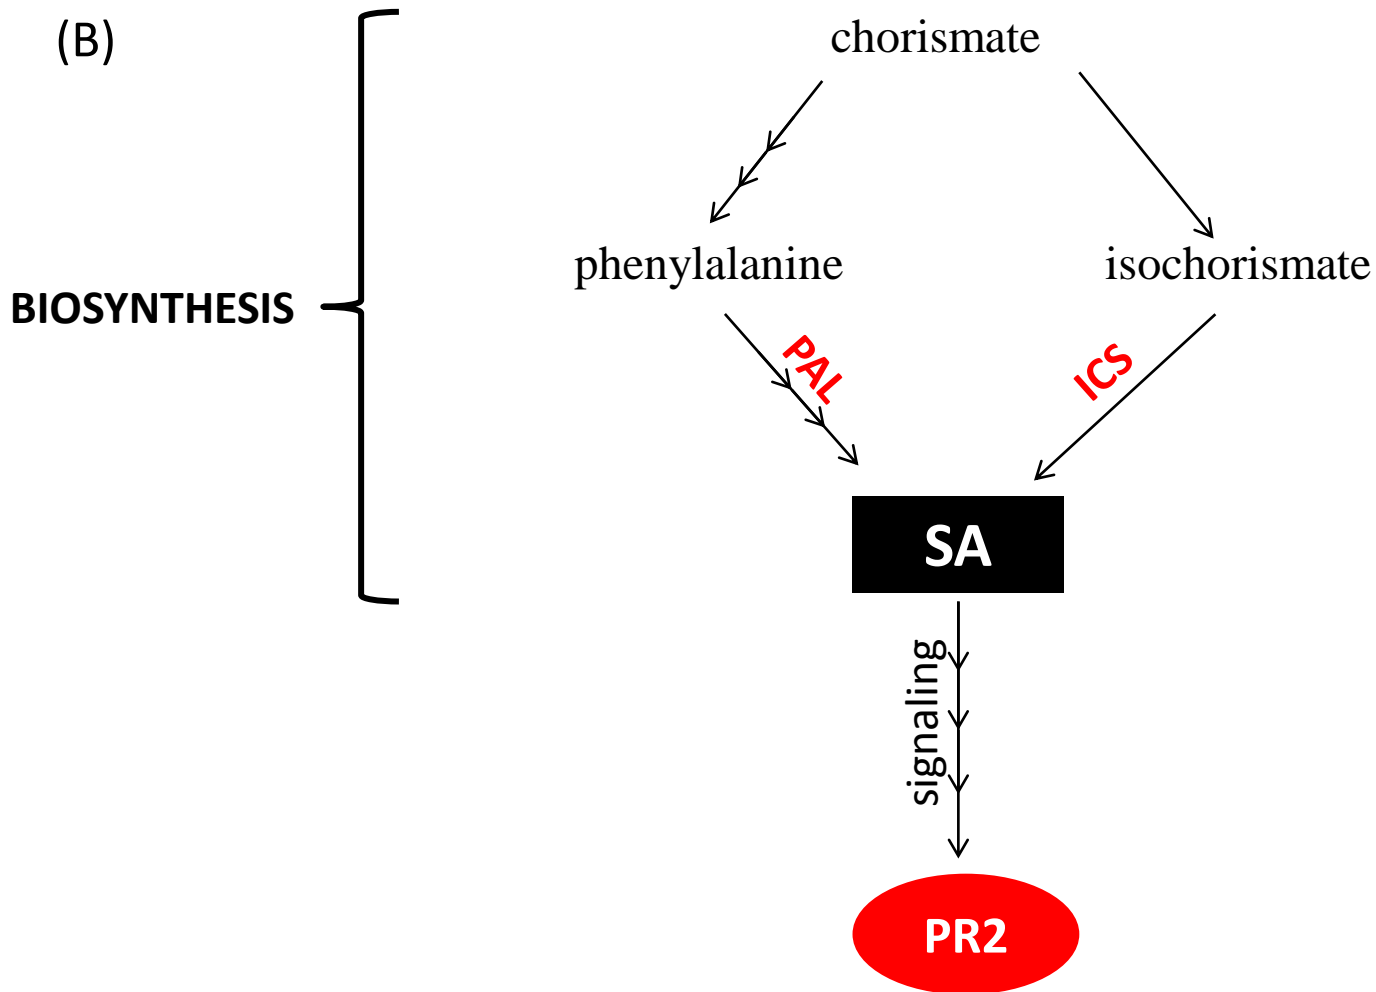

**Additional file 1.** Schematic diagram showing the biosynthetic and signaling pathways of ABA (A) and SA (B). Names in red are the genes analyzed in this work and different metabolites studied are presented in black squares.
