# Supplementary material for: Tolerance of citrus plants to the combination of high temperatures and drought is associated to the increase in transpiration modulated by a reduction in abscisic acid levels
Source: PubMed Central journal article supplement (PMC4848825; doi:10.1186/s12870-016-0791-7), 2016-04-27
Supplement: 12870_2016_791_MOESM2_ESM.pdf [file 12870_2016_791_MOESM2_ESM.pdf]

Additional File S1.- Table. Designed primers for gene expression analyses by quantitative RT-PCR.

| Citrus gene       | Locus             | Forward /<br>Reverse | Sequence (5'→3')                               | Amplicon<br>size (bp) |
|-------------------|-------------------|----------------------|------------------------------------------------|-----------------------|
| <b>CsNCED1</b>    | orange1.1g007379m | F<br>R               | AATGCTTGGGAAGAGCCTGAG<br>AGTGGACTCGCCGGTCTTTAG | 147                   |
| <b>CsCYP707A1</b> | orange1.1g038621m | F<br>R               | TCAATGTTGCACTGCTCTCC<br>CTTTGGCACCCATGAAAGAT   | 246                   |
| <b>CsAOG</b>      | orange1.1g022744m | F<br>R               | CGGGTTCAGTGTGGTCTT<br>GCCTCGAGAGAAATGGATGT     | 176                   |
| <b>CsBG18</b>     | orange1.1g010588m | F<br>R               | CAAGGCAAAACAGGGTGGAT<br>CAGCCTCAGAGCTGGTGAAT   | 212                   |
| <b>CsRAB18</b>    | orange1.1g028210m | F<br>R               | CTGAAGCTGAACGGGAGATT<br>TTGTGGTGGTAGAGGTGGTG   | 195                   |
| <b>CsACT</b>      | orange1.1g037845m | F<br>R               | CCCTTCCTCATGCCATTCTTC<br>CGGCTGTGGTGGTAAACATG  | 105                   |
| <b>CsTUB</b>      | orange1.1g013335m | F<br>R               | GGGGCAAATGAGCACTAAA<br>CGCCTGAACATCTCCTGAAT    | 187                   |
