# Supplementary material for: Tolerance of citrus plants to the combination of high temperatures and drought is associated to the increase in transpiration modulated by a reduction in abscisic acid levels
Source: PubMed Central journal article supplement (PMC4848825; doi:10.1186/s12870-016-0791-7), 2016-04-27
Supplement: 12870_2016_791_MOESM3_ESM.pdf [file 12870_2016_791_MOESM3_ESM.pdf]

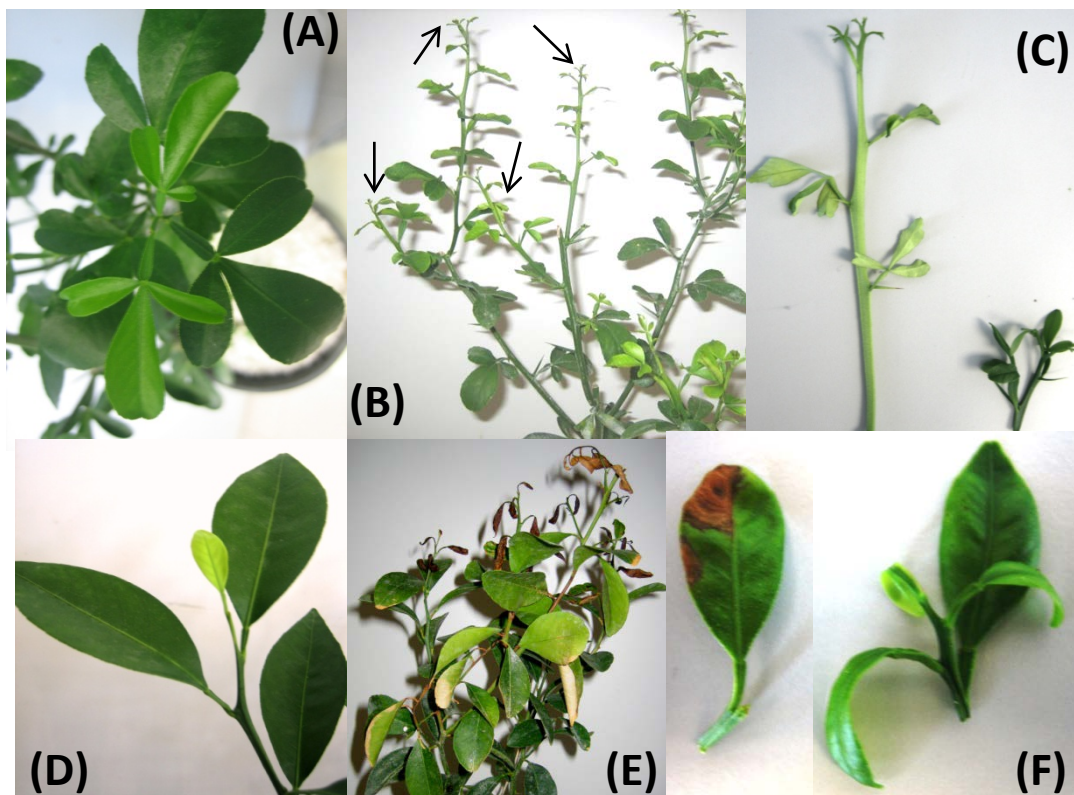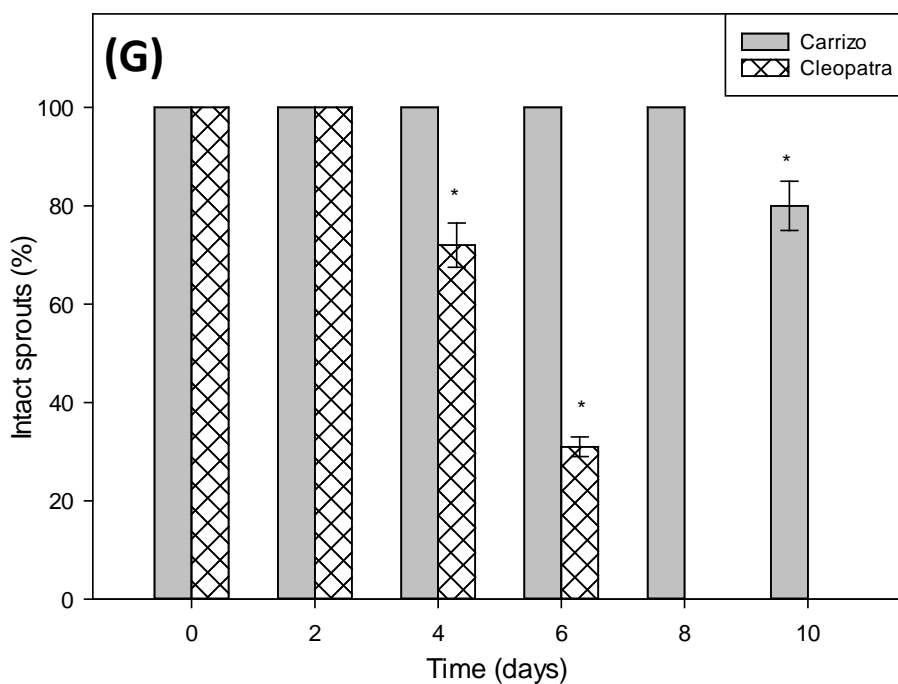

Additional File 3.- (A) Carrizo control sprouts (25°C); (B) Carrizo plants subjected to heat stress for 10 days; (C) sprouts on control (right) and heat-stressed (left) Carrizo plants; (D) Cleopatra control sprouts; (E) Cleopatra plants subjected to heat stress for 10 days; (F) sprouts on control (right) and heat-stressed (left) Cleopatra plants; (G) Integral sprouts (%) of Carrizo and Cleopatra seedlings subjected to heat stress for 10 days. Asterisks denote statistical significance at  $p \leq 0.05$ .
